# Supplementary material for: Accelerating the healing of superhydrophobicity through photothermogenesis
Source: Royal Society of Chemistry journal article supplement (doi:10.1039/c5ta04252f), 2015-01-01
Supplement: c5ta04252f1.pdf [file c5ta04252f1.pdf]

## Supporting Information

### Accelerating the self-healing of superhydrophobicity through photothermogenesis

Yanhua Liu <sup>a,b</sup>, Xiaowei Pei <sup>b</sup>, Zhilu Liu <sup>b\*</sup>, Bo Yu <sup>b\*</sup>, Pengxun Yan <sup>a,b</sup> and Feng Zhou<sup>b</sup>

<sup>a</sup>. School of Physical Science and Technology, Lanzhou University, Lanzhou  
730000, China.

<sup>b</sup>. State Key Laboratory of Solid Lubrication, Lanzhou Institute of Chemical  
Physics, Chinese Academy of Sciences, Lanzhou 730000, China.

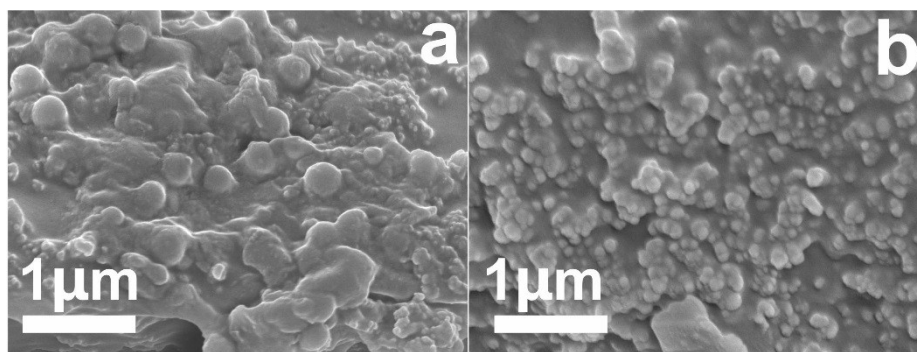

**Figure S1.** SEM images of cotton fabric coated with PDA@ODA-Fe<sub>3</sub>O<sub>4</sub> nanocapsules before and after NIR light irradiation.

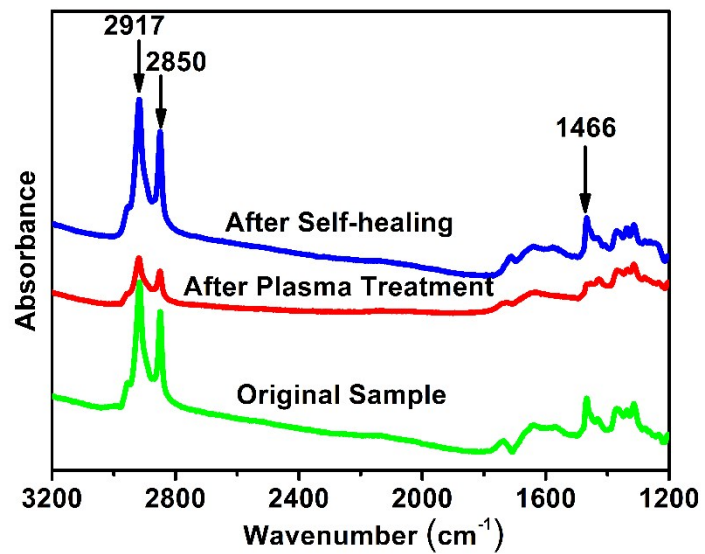

**Figure S2.** ATR-FTIR spectra of cotton fabric coated with PDA@ODA-Fe<sub>3</sub>O<sub>4</sub> nanocapsules, treated with plasma and NIR light irradiation.
